# Supplementary material for: Rural–Urban Differences in Cancer Incidence and Trends in the United States
Source: Oxford University Press journal article supplement (doi:10.1158/1055-9965.epi-17-0430), 2017-07-27
Supplement: 10559965epi170430-sup-183482_2_supp_4153611_9sy099.docx [file 10559965epi170430-sup-183482_2_supp_4153611_9sy099.docx]

**Supplementary Table: Cancer Incidence Rates by U.S. Census Region and Race/Ethnicity**

|  | **Northeast** | | **Midwest** | | **South** | | **West** | |
| --- | --- | --- | --- | --- | --- | --- | --- | --- |
|  | **Rural** | **Urban** | **Rural** | **Urban** | **Rural** | **Urban** | **Rural** | **Urban** |
| All Cancers  NH White  NH Black  Hispanic | 477.7c  428.4 c  368.5 | 496.7  480.8  392.9 | 445.8c  418.7c  305.9 c | 462.8  491.6  339.8 | 452.9  464.2  320.0 c | 454.4  463.0  348.7 | 425.7 c  332.4 c  328.3 c | 448.6  455.3  337.4 |
| Tobacco- Associated  NH White  NH Black  Hispanic | 209.2 c  192.9  159.9 | 206.8  204.2  162.7 | 204.1c  208.8c  135.9c | 202.3  232.4  148.3 | 218.3 c  218.2 c  156.5 c | 199.7  205.1  152.5 | 177.6  145.7c  150.1 c | 176.2  201.1  142.8 |
| HPV-Associated  NH White  NH Black  Hispanic | 12.5 c  7.6 c  10.1 | 11.5  13.5  12.7 | 11.9  8.4 c  9.0 | 11.9  13.0  9.7 | 14.0 c  13.6 c  10.4 | 13.6  12.1  9.6 | 11.6  --d  7.7 c | 11.5  10.6  9.0 |
| Prostate  NH White  NH Black  Hispanic | 118.7 c  172.1 c  122.7 | 125.4  221.3  142.5 | 107.3 c  144.8 c  83.5 c | 114.8  190.7  100.4 | 104.2 c  194.9  71.9 c | 111.8  197.9  98.9 | 112.9 c  118.4 c  82.4 c | 115.1  180.6  100.6 |
| Breast (female)  NH White  NH Black  Hispanic | 122.6 c  118.8  88.4 | 138.8  122.7  98.7 | 115.1c  112.2c  77.3 | 129.4  127.9  85.0 | 110.4 c  118.8 c  77.9 c | 125.7  125.5  92.6 | 117.5 c  90.8 c  88.0 | 134.7  126.4  90.7 |
| Lung and Bronchus  NH White  NH Black  Hispanic | 69.5 c  62.6  44.5 | 66.9  62.1  37.0 | 68.9  80.3  36.3 | 68.9  74.8  33.6 | 80.2 c  70.3 c  36.8 c | 69.7  65.1  33.7 | 55.0 c  52.1  35.9 c | 53.9  60.4  28.6 |
| Colorectal  NH White  NH Black  Hispanic | 43.3 c  37.2 c  35.2 | 41.7  46.8  37.8 | 44.5c  45.8c  29.2 | 40.9  51.4  32.5 | 44.3 c  54.9 c  37.4 | 38.6  48.5  36.7 | 36.8  29.4 c  37.7 c | 37.2  48.9  34.0 |
| Urinary Bladder  NH White  NH Black  Hispanic | 27.3  19.4 c  17.1 | 27.2  12.5  13.8 | 22.0c  15.0  10.7 | 23.0  12.7  12.0 | 20.6 c  10.2 c  9.9 c | 21.5  11.3  11.3 | 22.2  --d  10.2 | 22.2  13.5  10.4 |
| Melanoma  NH White  NH Black  Hispanic | 22.8 c  --d  8.5c | 24.9  1.0  3.5 | 19.6c  --d  5.1 | 21.9  0.9  4.7 | 22.2 c  1.2  5.4 | 26.6  1.1  4.8 | 26.9c  --d  5.6c | 31.0  13.5  4.5 |
| Kidney and Renal Pelvis  NH White  NH Black  Hispanic | 16.1 c  15.9  15.7 | 16.6  16.9  12.9 | 17.1c  17.0  14.1 | 16.8  19.7  16.1 | 17.6 c  17.7  17.2 | 16.4  17.7  16.6 | 13.9 c  11.0 c  16.5 | 14.7  18.0  16.2 |
| Non-Hodgkin Lymphoma  NH White  NH Black  Hispanic | 20.5 c  17.4  19.1 | 22.2  15.6  19.4 | 19.5c  12.6  16.6 | 20.5  14.4  16.6 | 17.8 c  12.5 c  15.5 c | 19.0  14.2  16.8 | 18.1c  --d  13.1 c | 19.5  14.8  17.2 |
| Leukemia  NH White  NH Black  Hispanic | 15.6  8.6  10.2 | 15.3  10.3  11.6 | 13.7  10.5  10.6 | 13.7  10.9  10.8 | 13.3  10.2  10.0 | 13.5  10.4  10.8 | 13.6  --d  9.8 | 13.8  11.1  10.2 |
| Oral Cavity and Pharynx  NH White  NH Black  Hispanic | 11.5  9.7  --d | 11.5  8.9  8,6 | 11.9  9.7  7.3 | 11.7  10.4  6.3 | 13.6 c  11.5 c  6.6 c | 13.3  9.2  7.5 | 11.7  --d  6.3 | 11.8  8.6  6.4 |
| Endometrial  NH White  NH Black  Hispanic | 31.5  --d  21.6 | 32.2  29.6  25.1 | 27.9 c  19.8 c  21.9 | 29.1  25.2  22.5 | 22.1  23.5  18.6 c | 22.2  23.5  21.5 | 23.5 c  27.4  18.3 c | 25.1  24.3  20.6 |
| Thyroid  NH White  NH Black  Hispanic | 16.4 c  7.9  13.3 | 21.3  11.6  16.2 | 12.7 c  5.2 c  7.7 c | 14.5  9.0  11.7 | 11.9 c  6.8 c  7.6 c | 13.3  8.3  12.7 | 12.6 c  --d  11.5 | 14.9  8.8  11.8 |
| Pancreas  NH White  NH Black  Hispanic | 12.8 c  10.1 c  9.9 | 13.5  15.9  11.7 | 11.7 c  14.1 c  8.7 c | 12.6  17.0  11.7 | 11.8  15.3  10.9 | 11.8  15.3  11.1 | 11.0 c  8.8 c  11.1 | 11.9  15.2  10.9 |
| Esophagus  NH White  NH Black  Hispanic | 6.0 c  --d  -- d | 5.3  11.5  3.4 | 5.4  5.3  3.9 | 5.4  4.9  2.9 | 4.6  5.9 c  2.8 | 4.7  4.3  2.6 | 5.2 c  --d  2.9 | 4.7  3.6  2.7 |
| Larynx  NH White  NH Black  Hispanic | 4.0 c  6.2d  --d | 3.5  4.2  3.4 | 4.2 c  3.8 c  --d | 3.9  5.3  2.3 | 5.1 c  6.3 c  2.9 | 4.0  4.7  2.9 | 2.8 c  --d  2.2 | 2.5  3.6  2.1 |
| Brain and Other Nervous System  NH White  NH Black  Hispanic | 7.6  --d  --d | 7.6  3.9  5.5 | 7.0 c  3.7  3.9 | 7.4  3.8  5.0 | 7.1 c  3.8  4.5 c | 7.4  4.2  5.4 | 7.3  --d  5.1 | 7.6  3.9  4.9 |
| Cervix  NH White  NH Black  Hispanic | 7.2 c  --d  --d | 6.3  10.7  10.4 | 7.6 c  9.4  6.9 c | 6.7  9.5  9.5 | 9.0 c  10.9 c  11.3 | 7.7  9.8  10.6 | 7.0 c  --d  7.1 c | 6.3  6.4  9.1 |

a Rates are expressed per 100,000 people and age-adjusted to the 2000 US standard population.

b NH=Non-Hispanic

cThe rate ratio indicates that the rural rates is statistically significantly different than the urban rate (p<0.05).

d This rate was based on fewer than 25 cases and is therefore statistically unstable and not displayed.
